# Supplementary material for: White light emissive molecular siblings
Source: Royal Society of Chemistry journal article supplement (doi:10.1039/c6cc00823b), 2016-01-01
Supplement: c6cc00823b1.pdf [file c6cc00823b1.pdf]

# Supporting Information

## White Light Emissive Molecular Siblings

Samir KumarSarkar, George Rajendra kumar and Pakkirisamy Thilagar\*

Department of Inorganic and Physical Chemistry, Indian Institute of Science,  
Bangalore–560012, India. Fax: +91-80-2360-1552; Tel: +91-80-2293-3352;  
E-mail: thilagar@ipc.iisc.ernet.in

### Table of Contents:

|                     |                                   |
|---------------------|-----------------------------------|
| <b>Page S2-S3:</b>  | Experimental Section              |
| <b>Page S4-S9:</b>  | NMR & Mass Characterizations data |
| <b>Page S9-S14:</b> | Photo-physical data               |

## Experimental Section

### Materials and general methods:

BF<sub>3</sub>.Et<sub>2</sub>O, DDQ, Magnesium, anhydrous calcium hydride (CaH<sub>2</sub>) were purchased from Sigma-Aldrich (USA). Pyrrole, 2-Bromothiophene, triethylamine, TFA, DMF were purchased from SD Fine Chemicals (India). CDCl<sub>3</sub> was purchased from Merck (Germany). Standard Schlenk technique was used for reactions requiring inert nitrogen atmosphere. CH<sub>2</sub>Cl<sub>2</sub> was dried over CaH<sub>2</sub> and distilled under N<sub>2</sub> atmosphere. DMF was dried over Na<sub>2</sub>SO<sub>4</sub> for overnight and distilled out at reduced pressure and stored over 3Å molecular sieves. THF and Et<sub>2</sub>O were dried over sodium. Triethylamine was refluxed over sodium for 24 hours and distilled out at N<sub>2</sub> atmosphere and stored in an air tight stored round bottom flask. Bithiophene, 5-formyl-2,2'-bithiophene were synthesis according literature procedure<sup>1,2</sup>. All 400MHz <sup>1</sup>H NMR, 125.7 <sup>13</sup>C NMR Spectra were recorded by a Bruker Advance 400MHz NMR Spectrometer. Solution <sup>1</sup>H NMR and <sup>13</sup>C NMR Spectra were referenced internally to the solvent signals. High resolution mass spectra were obtained from Q-TOF instrument by electrospray ionization (ESI). Electronic absorption spectra were recorded on a Perkin Elmer LAMBDA 750 UV/visible spectrophotometer. Solution were prepared using a microbalance (± 0.1mg) and volumetric glassware and then charged in quartz cuvettes with sealing screw caps. Fluorescence emission studies were carried out on a Horiba JOBIN YVON Fluoromax-4 spectrometer.

### Synthesis of 2

2-methyl-pyrrole (0.3 mL, 3.59 mmol) and borane-bithiophene-aldehyde (0.5 g, 1.13 mmol) were stirred at room temperature under nitrogen atmosphere for 30 min, then one drop BF<sub>3</sub>.OEt<sub>2</sub> was added. The resultant mixture was stirred for another 6 h at room temperature and then DDQ (0.31 gm, 1.37 mmol) was added and stirred for additional 6 hours at room temperature. Then, Et<sub>3</sub>N (1.6 ml, 11.46 mmol) was added and stirring was continued for another 1 hour. The resultant product was allowed to react with BF<sub>3</sub>•OEt<sub>2</sub> (1.6 ml, 13 mmol) and the resultant mixture was stirred for 12 h. The crude product was extracted with dichloromethane and purified using column chromatography (ethyl acetate and petroleum ether (10:90)). Red color solid, Yield: 0.250 g, 35%. <sup>1</sup>H NMR (400 MHz, CDCl<sub>3</sub>, δ in ppm) 7.39 (d, *J* = 8 Hz, 2H, thiophene C-H), 7.34 (2H, thiophene C-H ), 7.10 (d, *J* = 4 Hz, 2H, BODIPY C-H), 6.85 (s, 4H,

Ar C-H), 6.31 (d,  $J = 4$  Hz, 2H, BODIPY C-H), 2.65 (s, 6H, -CH<sub>3</sub>), 2.32 (s, 6H, Mesitylene -CH<sub>3</sub>), 2.15 (s, 12H, Mesityl -CH<sub>3</sub>). <sup>13</sup>CNMR (100.00 MHz, CDCl<sub>3</sub>,  $\delta$  in ppm) 158.2 (BODIPY-C), 148.4 (Thiophene-C), 142.2 (Ar-C), 141.7 (Ar-C), 141.3 (Ar-C), 139.3 (BODIPY-C), 138.2 4 (Thiophene-C), 134.9 4 (Thiophene-C), 134.2 4 (Thiophene-C), 133.1 (BODIPY-C), 130.5 (Thiophene-C), 128.7 (BODIPY-C), 127.3 (Ar-C), 127.2 (Thiophene-C), 125.7 (BODIPY-C), 119.9 (BODIPY-C), 23.9 (Mesitylene-CH<sub>3</sub>-C), 21.7 (Mesitylene-CH<sub>3</sub>-C), 15.5 (BODIPY-CH<sub>3</sub>-C). <sup>19</sup>F NMR (376 MHz, CDCl<sub>3</sub>,  $\delta$  in ppm) -147.5 (q,  $J = 31.96$  Hz). MALDI-Mass:  $M/Z = 631.282$  [M] (28.2%), 613.274 [M-F] (100%).

### Synthesis of 3

Compound 3 was prepared following a procedure similar to that of 2. The quantities involved and characterization data are as follows: borane-bithiophene-aldehyde (1.0g, 2.26 mmol), 2,4-dimethyl-pyrrole (0.52 ml, 4.97 mmol), DDQ (0.62 g, 2.71 mmol), Et<sub>3</sub>N (3.2 ml, 22.6 mmol), BF<sub>3</sub>•OEt<sub>2</sub> (3.2 ml, 26 mmol). Red color solid. Yield: 550 mg, 37%. <sup>1</sup>H NMR (400 MHz, CDCl<sub>3</sub>,  $\delta$  in ppm) 7.38 (d,  $J = 3.6$  Hz, 2H, thiophene C-H), 7.33 (d,  $J = 3.6$  Hz, 2H, thiophene C-H), 7.28 (d,  $J = 3.6$  Hz, 2H, thiophene C-H), 6.89 (d,  $J = 3.6$  Hz, 2H, thiophene C-H), 6.84 (s, 4H, Ar C-H), 6.01 (s, 2H, BODIPY C-H), 2.55 (s, 6H, -CH<sub>3</sub>), 2.31 (s, 6H, Mesitylene -CH<sub>3</sub>), 2.16 (s, 12H, Mesitylene -CH<sub>3</sub>), 1.72 (s, 6H, -CH<sub>3</sub>). <sup>13</sup>CNMR (100.00 MHz, CDCl<sub>3</sub>,  $\delta$  in ppm) 156.8, 150.1, 148.9, 143.8, 141.8, 141.2, 140.0, 139.1, 135.0, 133.2, 132.7, 129.4, 128.6, 126.8, 125.4, 122.0, 23.9, 21.6, 15.1, 14.4. <sup>19</sup>F NMR (376 MHz, CDCl<sub>3</sub>,  $\delta$  in ppm) -146.2 (q,  $J = 32.33$  Hz). MALDI-Mass:  $M/Z = 660.246$  [M] (47.8%), 641.213 [M-F] (85.4%).

## Spectral Characterization

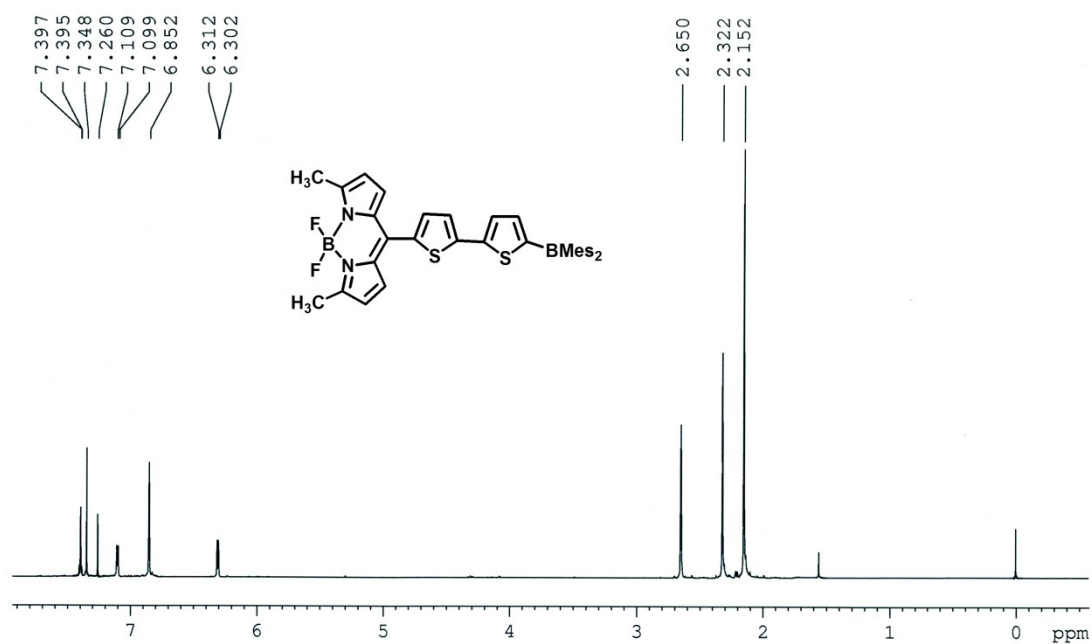

Figure S1: <sup>1</sup>H NMR of 2

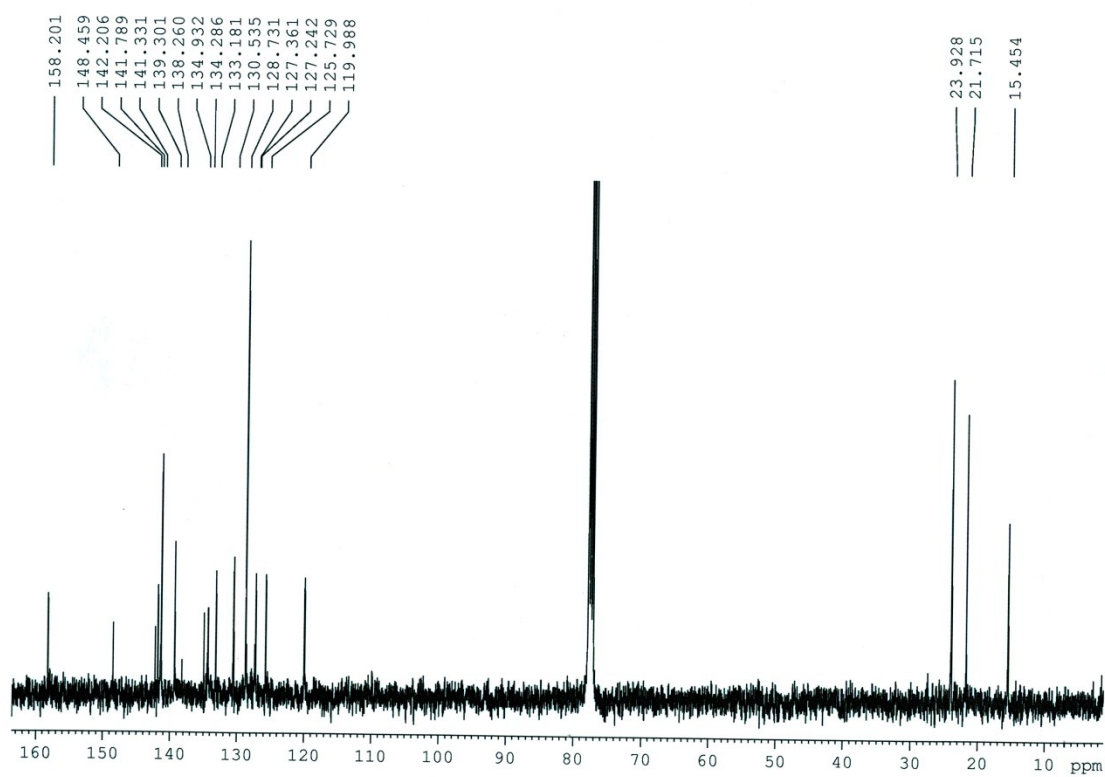

Figure S2: <sup>13</sup>C NMR of 2

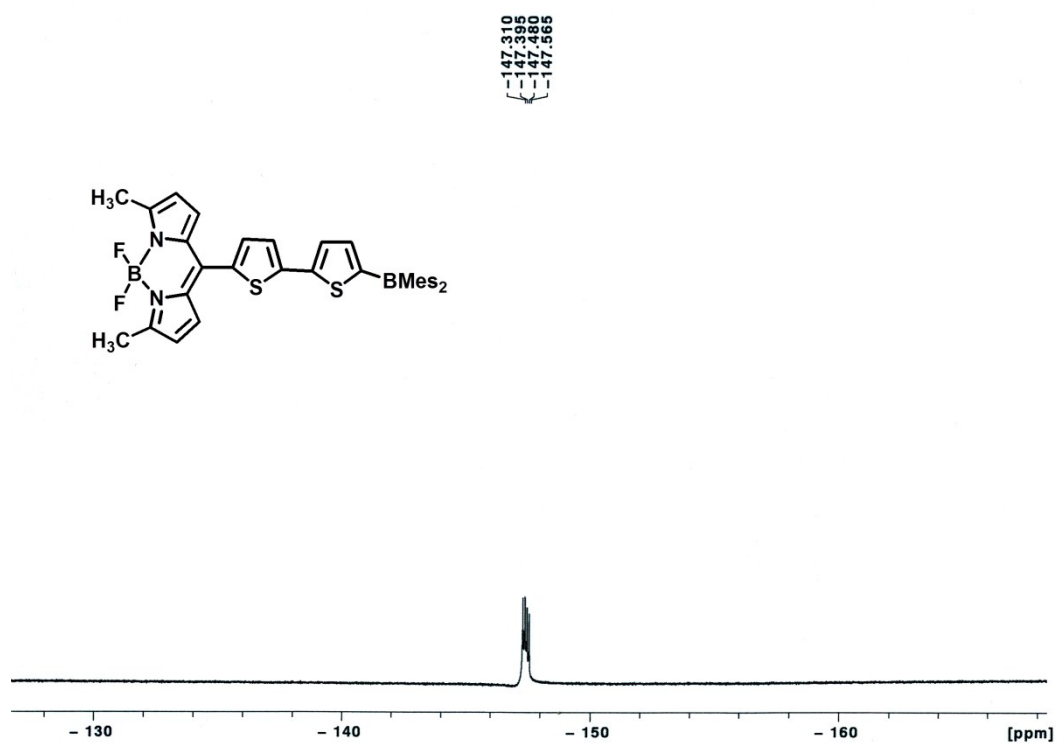

**Figure S3:**  $^{11}\text{B}$  NMR of **2**.  $^{11}\text{B}$  resonance of tricoordinated boron center could not be observed

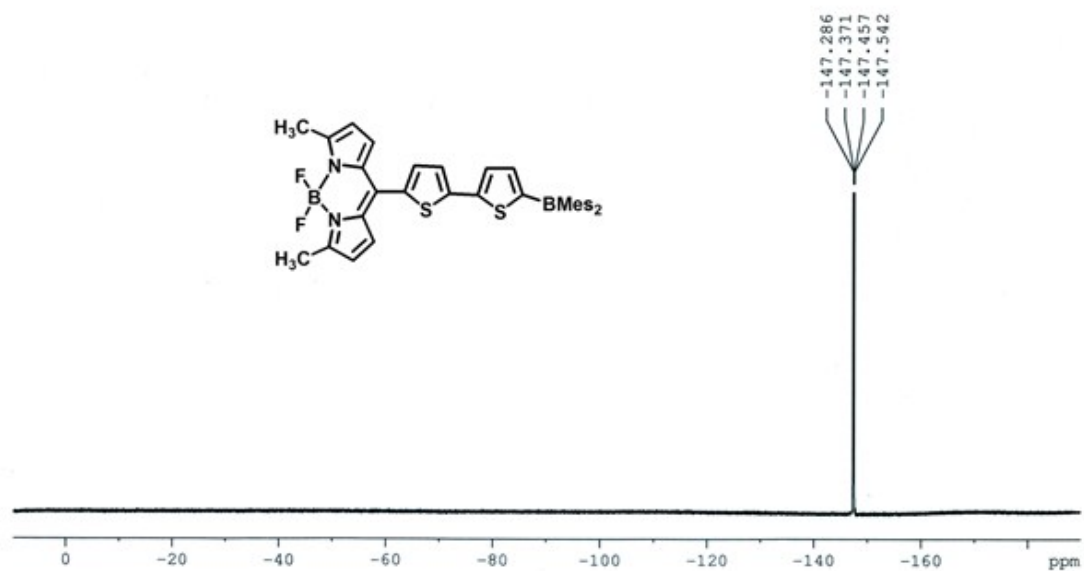

**Figure S4:**  $^{19}\text{F}$  NMR of **2**

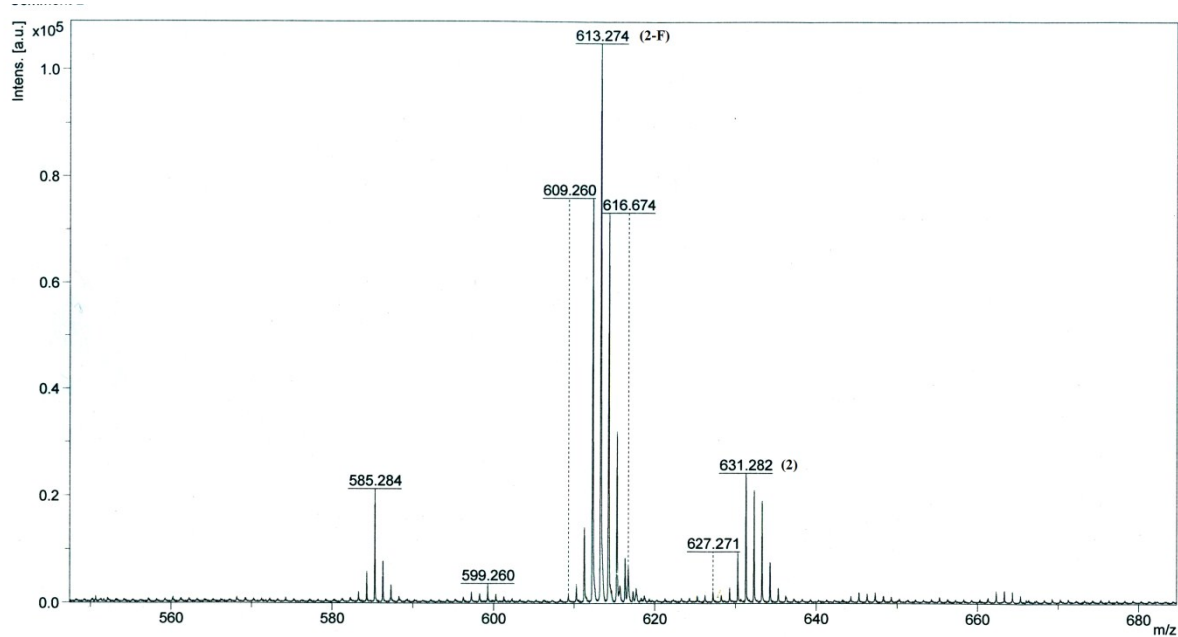

Bruker Daltonics flexAnalysis

printed: 10/22/2013 5:26:16 PM

**Figure S5:** MALDI-Mass of spectrum of **2**

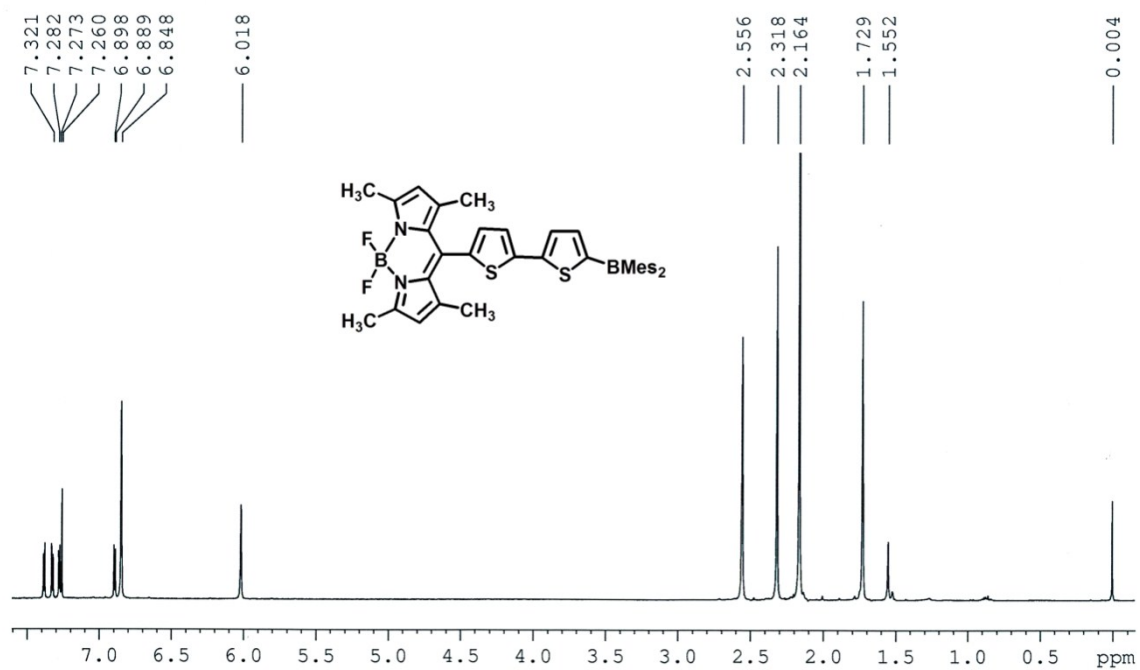

**Figure S6:**  $^1\text{H}$  NMR of **3**

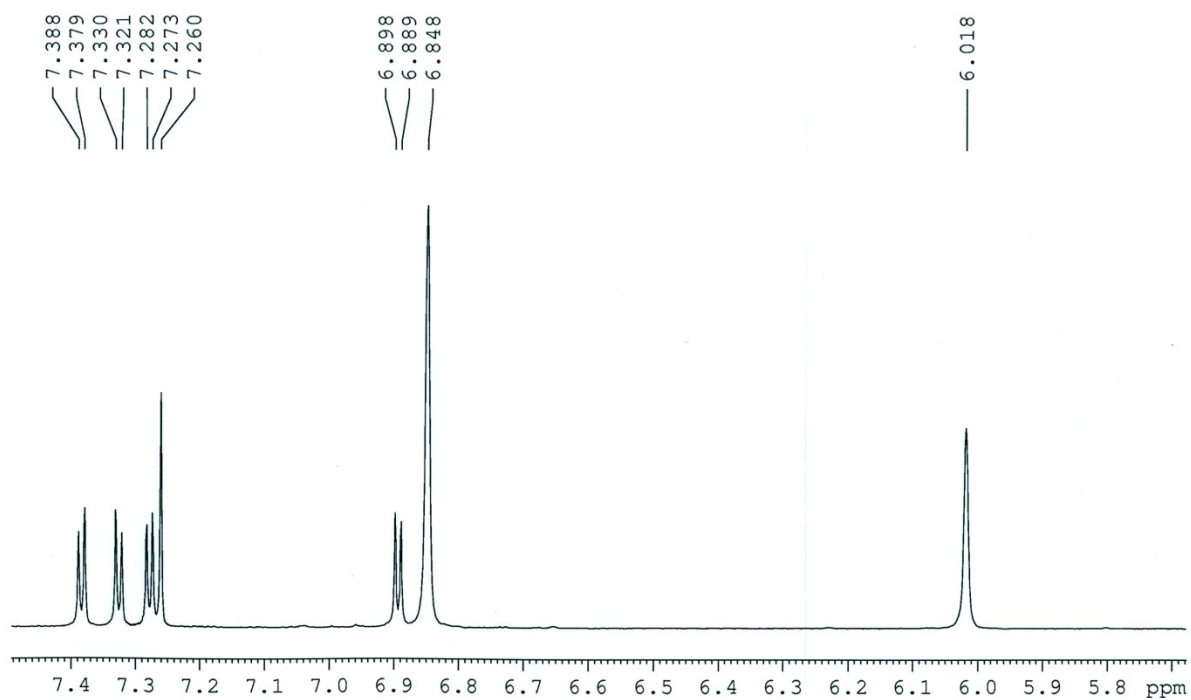

**Figure S7:**  $^1\text{H}$  of **3** (enlarge view of aromatic region)

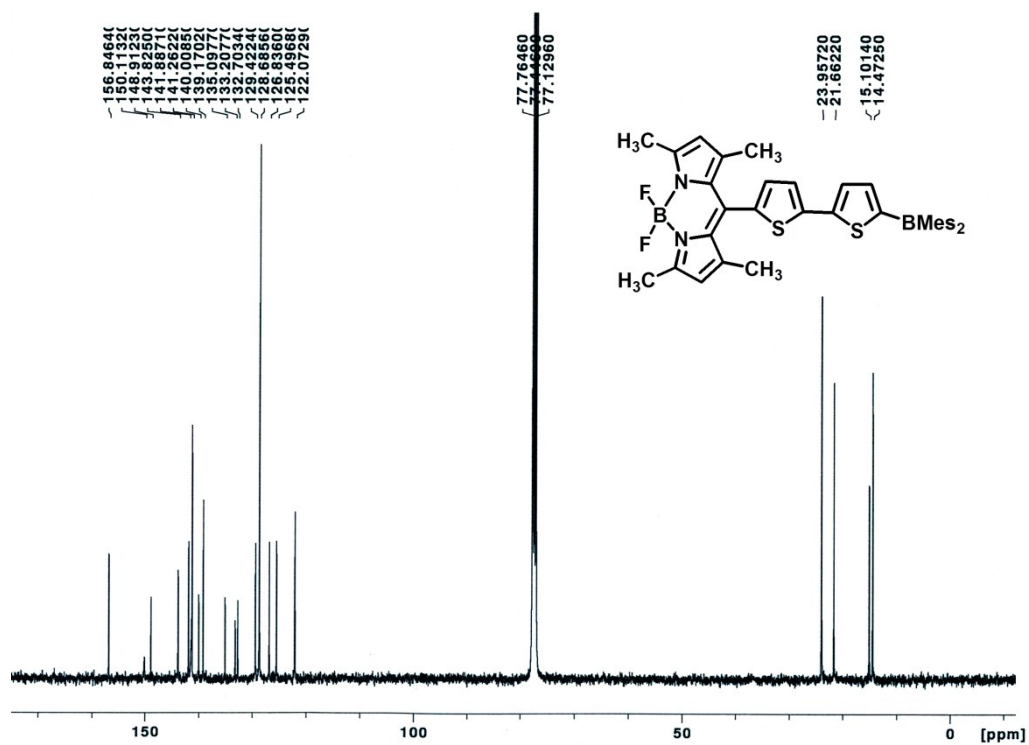

**Figure S8:**  $^{13}\text{C}$  NMR of **3**

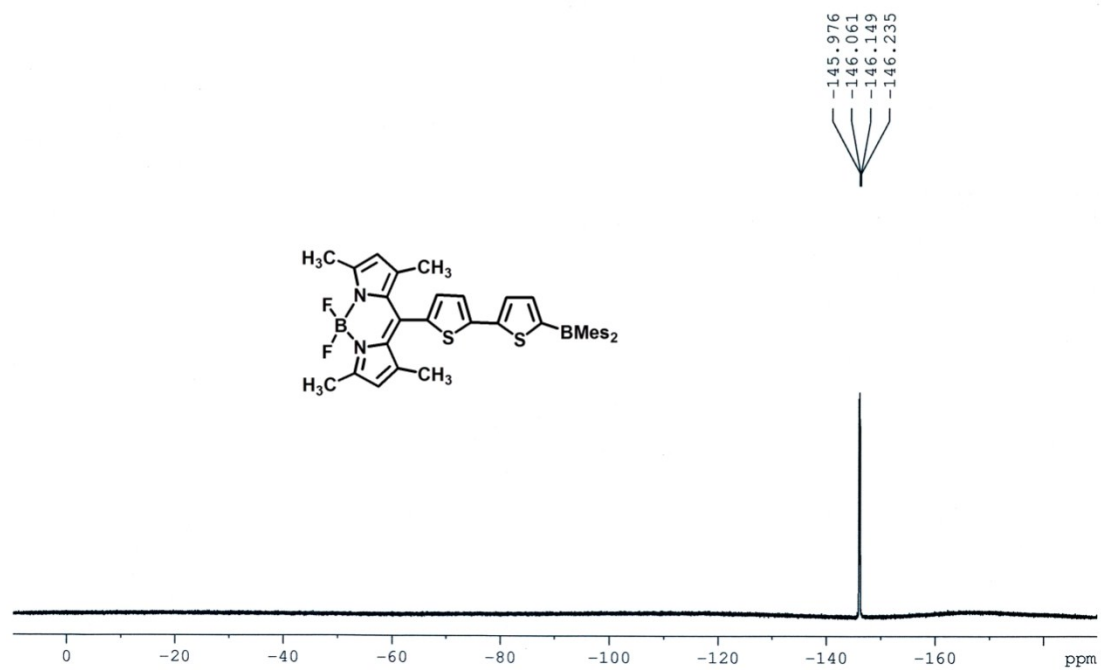

**Figure S9:**  $^{11}\text{F}$  NMR of 3

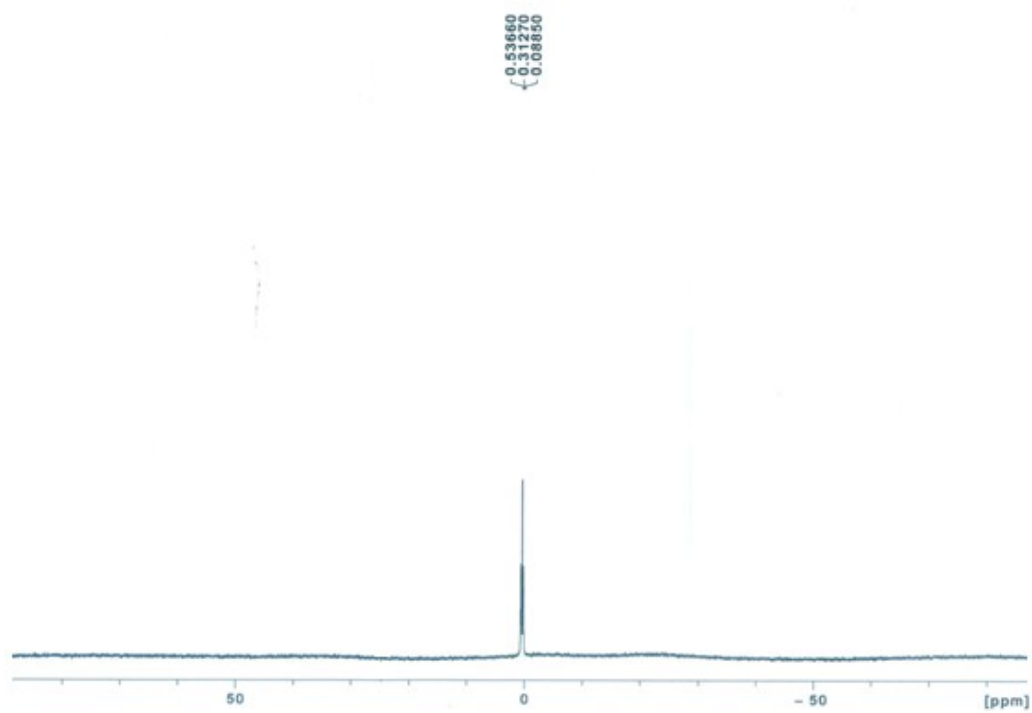

**Figure S10:**  $^{11}\text{B}$  NMR of 3



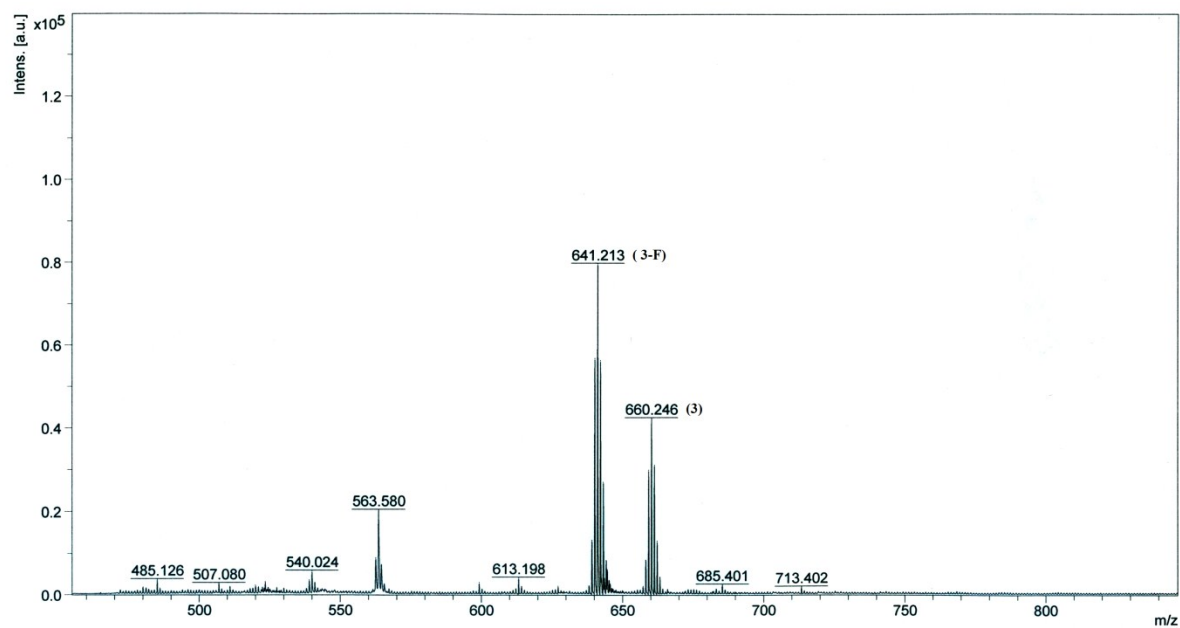

Bruker Daltonics flexAnalysis

printed: 10/15/2013 5:32:36 PM

**Figure S11:** MALDI-Mass of spectra **3**

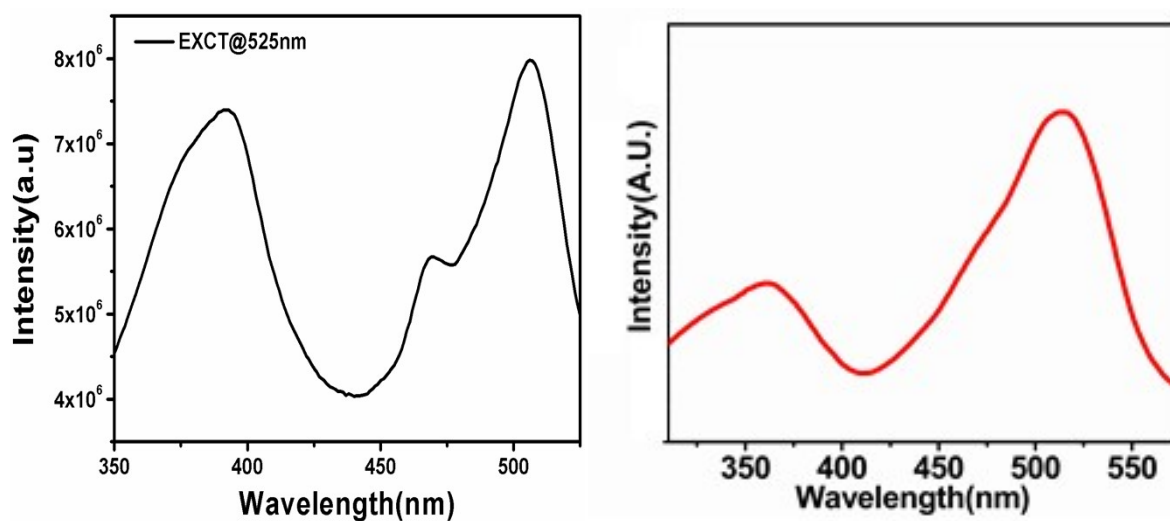

**Figure S12:** Excitation spectra of **2** (left) ( $\lambda_{em}$  525 nm) and **3** (right) ( $\lambda_{em}$  600 nm) in DCM

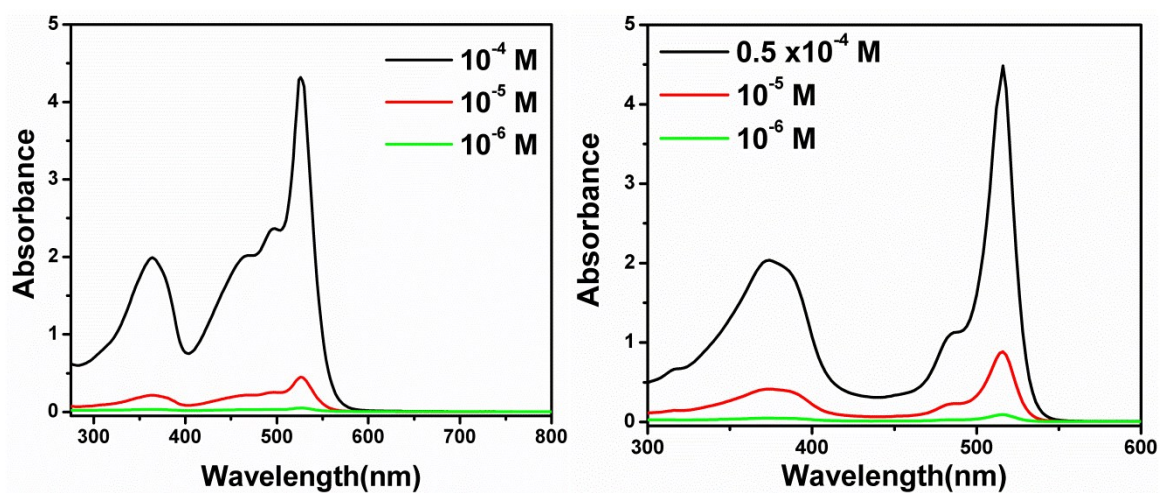

**Figure S13:** Concentration Variation UV-Vis Spectra of **2** (left) and **3** (right) in DCM

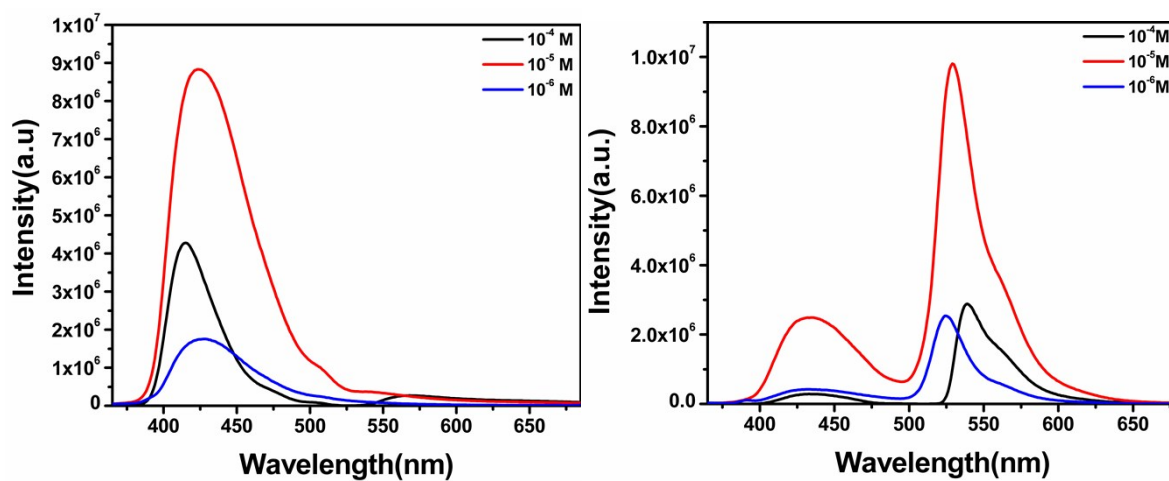

**Figure S14:** Concentration Variation Emission Spectra of **2** (left) and **3** (right) ( $\lambda_{\text{ex}} = 350$  nm in DCM)

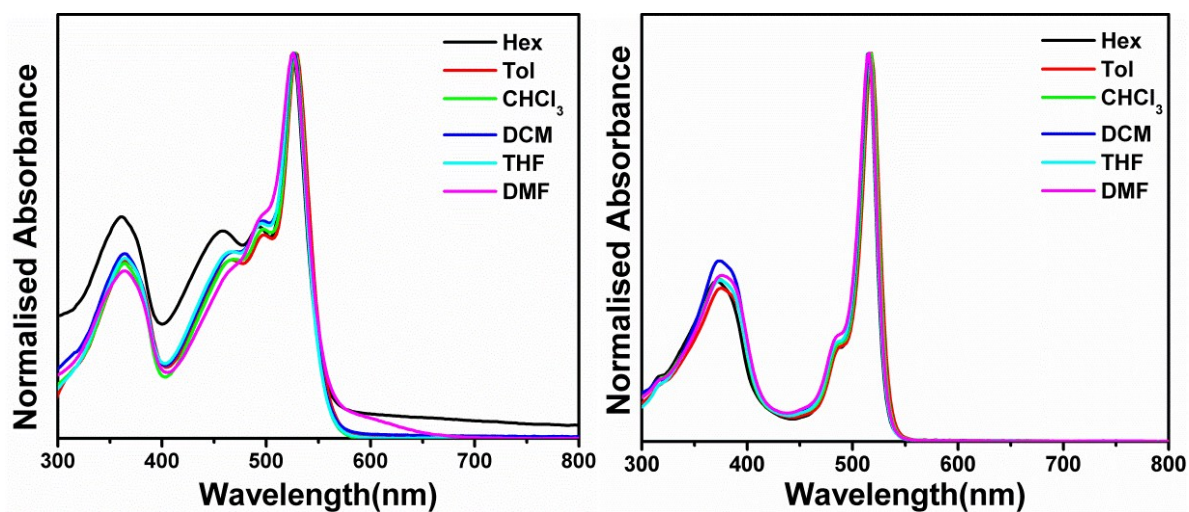

**Figure S15:** Absorption spectra of **2**(left) and **3** (right) in different solvents ( $10^{-5}$ M)

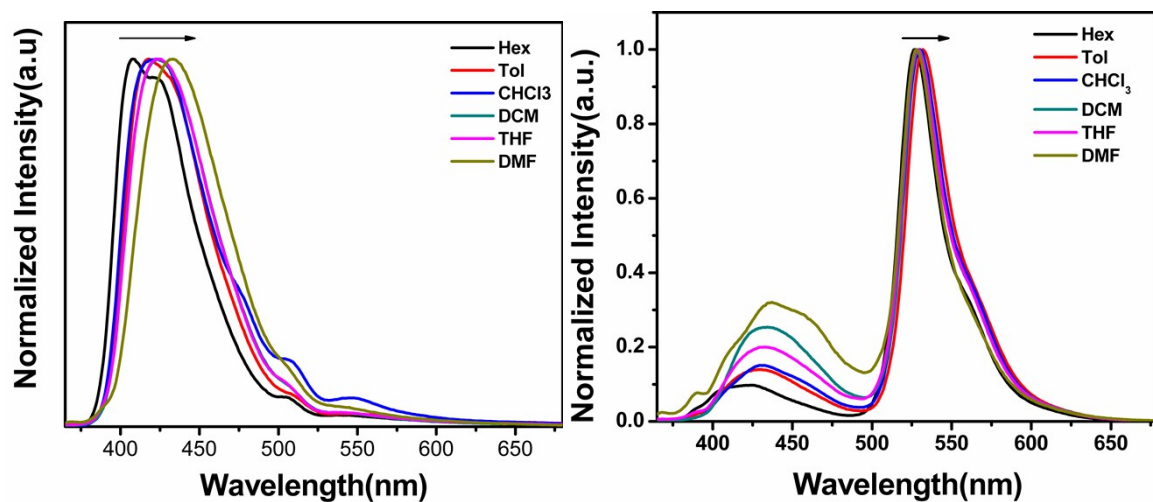

**Figure S16:** Emission spectra of **2** (left) and **3** (right) in different solvents ( $\lambda_{\text{ex}} = 350$  nm,  $10^{-5}$ M)

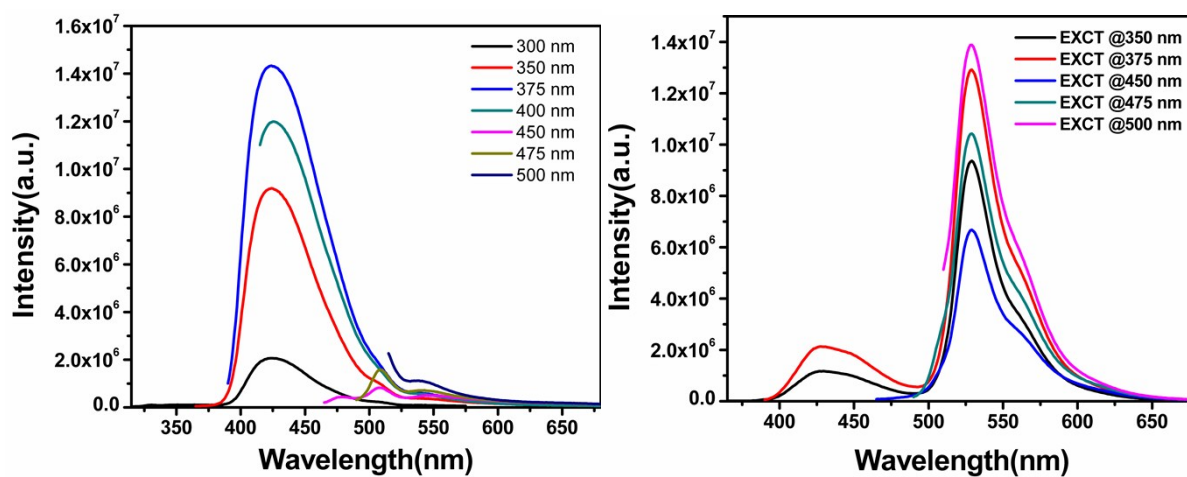

**Figure S17:** Emission spectra of **2** (left) and **3** (right) on different excitations ( $10^{-5}$ M in DCM)

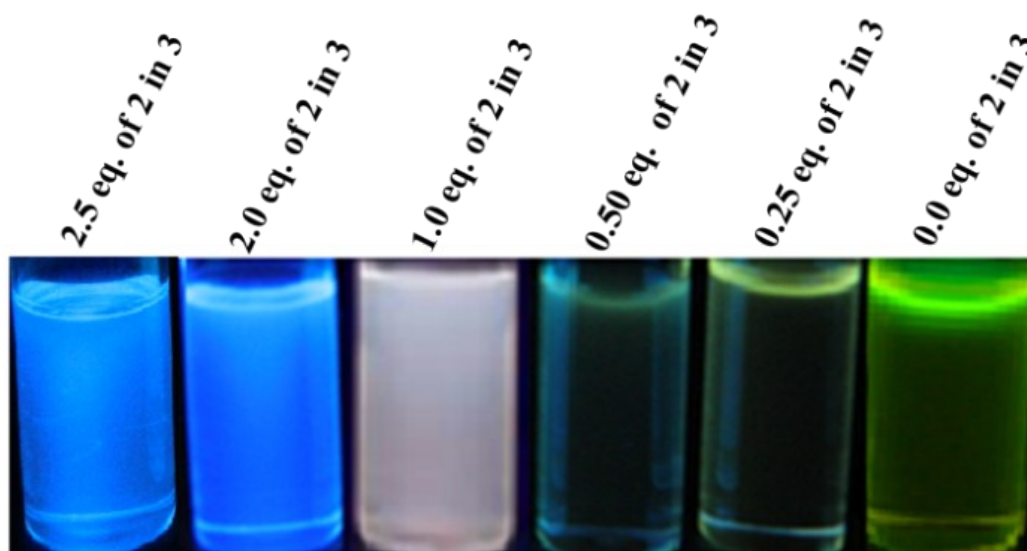

**Figure 18.** Photographs of different colour emission from different molar ratio of **2** and **3** in  $\text{CH}_2\text{Cl}_2$  under UV light (365 nm).
